# Supplementary material
Source: PubMed Central journal article supplement (PMC4963295)

## SUPPLEMENTAL DIGITAL CONTENT 2

**FIGURE:** Elevation of Alzheimer-type biomarkers in TBI mice. Immunohistochemical staining of hippocampus and parietal cortex **(A)** revealed elevation of hyperphosphorylated tau and A $\beta$ , two key hallmarks of Alzheimer disease in ipsilateral versus contralateral regions **(B)**.

Red: PHF1 staining against phosphor-tau at serine 396/404 (Scale bar = 100  $\mu$ m, inset scale bar = 10  $\mu$ m); Green: 4G8 staining against APP and A $\beta$  (Scale bar = 50  $\mu$ m)

\*( $p < 0.05$ ), \*\*( $p < 0.01$ ), \*\*\*( $p < 0.001$ ), one way ANOVA, Bonferroni's post hoc test

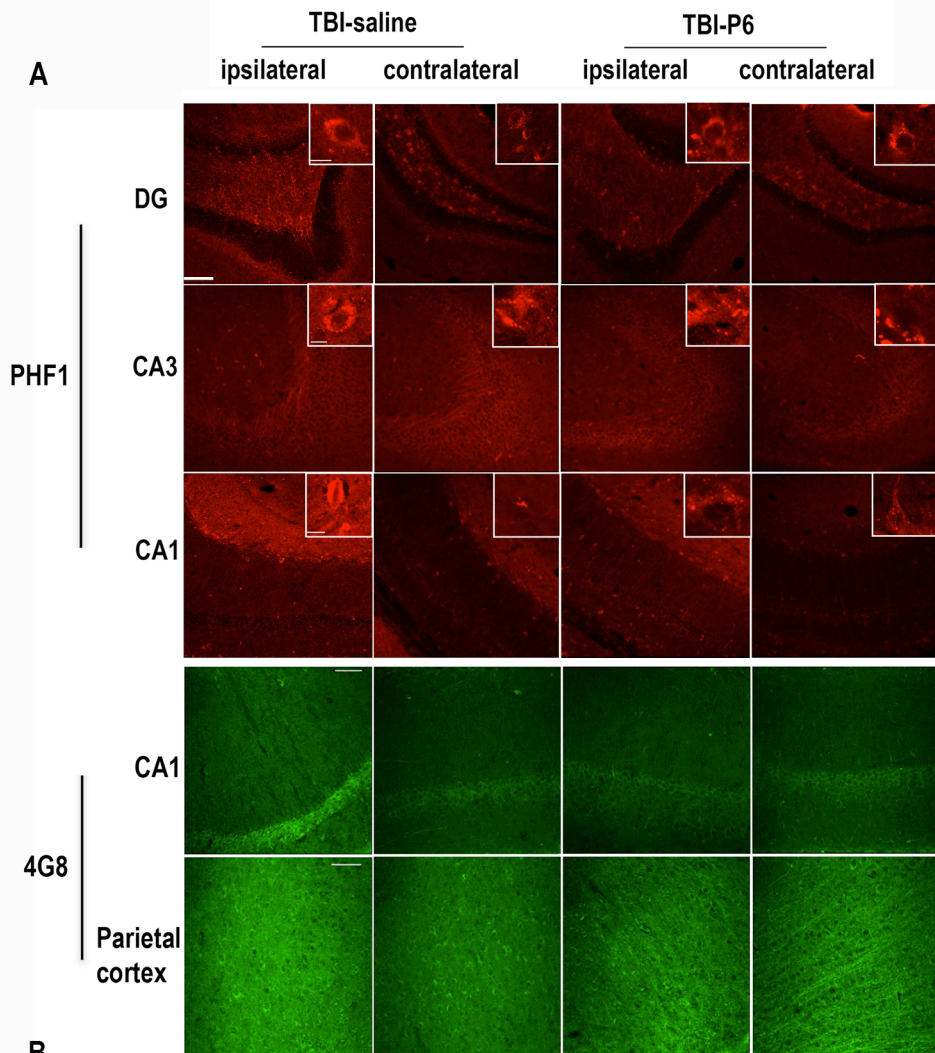

**B**

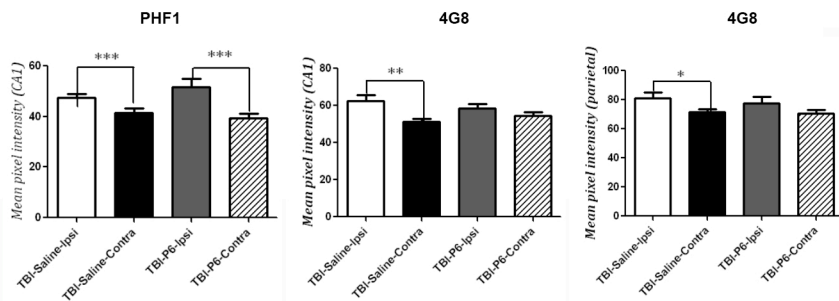

Supplement: NIHMS803462-supplement-SUPPLEMENTAL_DIGITAL_CONTENT_2.pdf [file NIHMS803462-supplement-SUPPLEMENTAL_DIGITAL_CONTENT_2.pdf]
